# Supplementary material for: Comparative locomotor costs of domestic dogs reveal energetic economy of wolf-like breeds
Source: Oxford University Press journal article supplement (doi:10.1242/jeb.144188), 2016-01-01
Supplement: jeb144188supp.pdf [file jeb144188supp.pdf]

SUPPLEMENTARY MATERIALS

**Table S1. Kinematic parameter definitions.** Measurement units are enclosed in parentheses.

|                                                                   |                                                                                                                          |
|-------------------------------------------------------------------|--------------------------------------------------------------------------------------------------------------------------|
| Protraction length* (m)                                           | The paw's maximum forward excursion distance, measured from the ground directly beneath the top of the scapula (withers) |
| Protraction angle (deg)                                           | The angle from the paw at maximum forward excursion to the ground directly beneath the withers                           |
| Retraction length* (m)                                            | The paw's maximum backward excursion distance, measured from the ground directly beneath the hip                         |
| Retraction angle (deg)                                            | The angle from the paw at maximum backward excursion to the ground directly beneath the hip                              |
| Stride duration (s)                                               | The length of time between two consecutive touchdowns of the same limb                                                   |
| Swing phase duration (s)                                          | The length of time between the limb lifting off and touching down again                                                  |
| Stance phase duration<br>(i.e. contact time, t <sub>c</sub> ) (s) | The length of time that the limb is in contact with the ground                                                           |
| Head angle (deg)                                                  | The obtuse angle of the dog's head relative to its back topline (hip to withers)                                         |
| Hip angle (deg)                                                   | The obtuse angle from dog's withers to the hip's iliac crest to the hindlimb hock                                        |
| Vertical displacement (cm)                                        | The maximum vertical distance covered by the dog's back, as measured from the withers                                    |

\* indicates linear measurement normalized by fore or hindlimb length of individual dog for direct comparison

**Table S2. Overground stride mechanics for all breeds examined across three distinct gaits.**

|                                                | Walk                    |                        |                        | Trot                   |                        |                        | Gallop                 |                       |                        |
|------------------------------------------------|-------------------------|------------------------|------------------------|------------------------|------------------------|------------------------|------------------------|-----------------------|------------------------|
|                                                | Northern                | Hound                  | Retriever              | Northern               | Hound                  | Retriever              | Northern               | Hound                 | Retriever              |
| Speed (m·s <sup>-1</sup> )                     | 1.27±0.04 <sup>A</sup>  | 1.28±0.05 <sup>A</sup> | 1.23±0.05 <sup>A</sup> | 2.7±0.06 <sup>AB</sup> | 2.51±0.09 <sup>B</sup> | 2.8±0.07 <sup>A</sup>  | 4.96±0.11 <sup>A</sup> | 4.9±0.2 <sup>A</sup>  | 5.94±0.14 <sup>B</sup> |
| Stride frequency<br>(strides·s <sup>-1</sup> ) | 1.5±0.04 <sup>AB</sup>  | 1.57±0.05 <sup>A</sup> | 1.38±0.05 <sup>B</sup> | 2.1±0.03 <sup>AB</sup> | 2.2±0.04 <sup>A</sup>  | 2.07±0.03 <sup>B</sup> | 2.61±0.03 <sup>A</sup> | 2.6±0.06 <sup>A</sup> | 2.64±0.04 <sup>A</sup> |
| Stride length (m)                              | 0.84±0.02 <sup>AB</sup> | 0.82±0.02 <sup>B</sup> | 0.9±0.02 <sup>A</sup>  | 1.26±0.02 <sup>A</sup> | 1.13±0.03 <sup>B</sup> | 1.36±0.02 <sup>C</sup> | 1.91±0.04 <sup>A</sup> | 1.91±0.1 <sup>A</sup> | 2.26±0.04 <sup>B</sup> |

Data are mean ± s.e.m.  
Intergroup means not connected by a common letter differ statistically (p<0.05).

**Table S3. Estimates and 95% confidence intervals for 3-parameter exponential decay models of dog breed mass-specific total (COT<sub>TOT</sub>) and locomotor (COT<sub>NET</sub>) costs of transport (J·kg<sup>-1</sup>·m<sup>-1</sup>) as a function of animal speed.** The asymptote of each model reflects the minimum transport cost (COT<sub>MIN</sub>) for each breed group.

|                                                                                           |           | Northern           |                     | Hound              |                    | Retriever          |                    |
|-------------------------------------------------------------------------------------------|-----------|--------------------|---------------------|--------------------|--------------------|--------------------|--------------------|
|                                                                                           |           | COT <sub>TOT</sub> | COT <sub>NET</sub>  | COT <sub>TOT</sub> | COT <sub>NET</sub> | COT <sub>TOT</sub> | COT <sub>NET</sub> |
| Asymptote                                                                                 | Lower 95% | 2.69               | 1.97                | 3.57               | 2.8                | 3.38               | 2.75               |
|                                                                                           | Estimate  | 3.01 <sup>A</sup>  | 2.1 <sup>A</sup>    | 4.17 <sup>B</sup>  | 3.35 <sup>B</sup>  | 3.81 <sup>B</sup>  | 2.96 <sup>B</sup>  |
|                                                                                           | Upper 95% | 3.34               | 2.23                | 4.76               | 3.91               | 4.23               | 3.17               |
| Scale                                                                                     | Lower 95% | 10.51              | -4.05e8             | 13.67              | -8.67              | 4.5                | -3214.8            |
|                                                                                           | Estimate  | 20.36 <sup>A</sup> | 4.3e6 <sup>A</sup>  | 22.14 <sup>A</sup> | 36.3 <sup>A</sup>  | 16.46 <sup>A</sup> | 389.1 <sup>A</sup> |
|                                                                                           | Upper 95% | 30.21              | 4.13e8              | 30.61              | 81.19              | 28.43              | 3993.1             |
| Decay Rate                                                                                | Lower 95% | -3.63              | -244.7              | -1.43              | -6.53              | -4.49              | -33.11             |
|                                                                                           | Estimate  | -2.71 <sup>A</sup> | -31.94 <sup>A</sup> | -0.84 <sup>B</sup> | -4.16 <sup>A</sup> | -3.06 <sup>A</sup> | -12.6 <sup>A</sup> |
|                                                                                           | Upper 95% | -1.78              | 180.8               | -0.25              | -1.8               | -1.63              | 7.92               |
| AIC <sub>c</sub>                                                                          |           | 217.2              | 119.2               | 85.6               | 97.7               | 125.5              | 96.8               |
| R <sup>2</sup>                                                                            |           | 0.69               | 0.58                | 0.90               | 0.62               | 0.65               | 0.24               |
| Intergroup means that are not connected by a common letter differ statistically (p<0.05). |           |                    |                     |                    |                    |                    |                    |

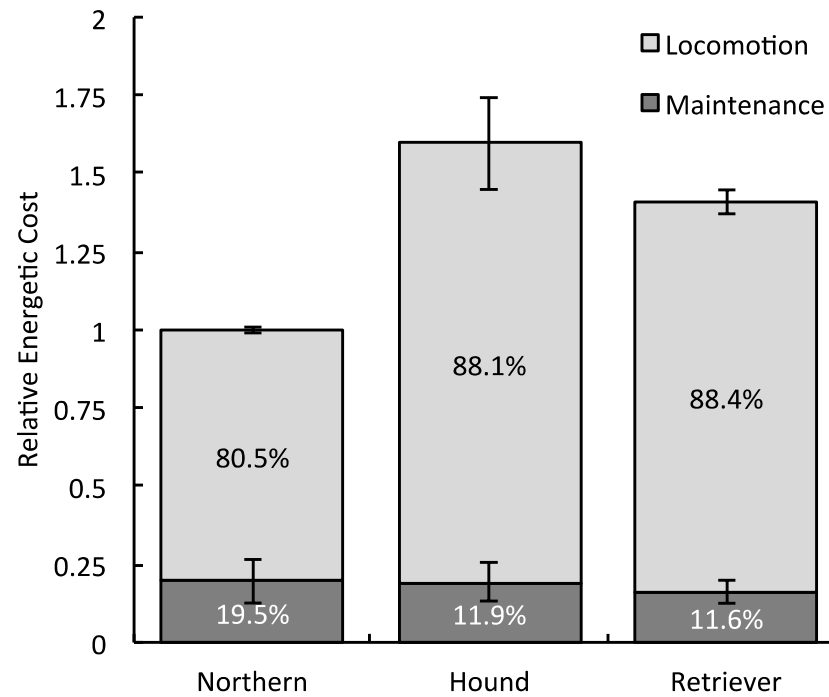

**Figure S1. Relative mass-specific energetic demands** (mean  $\pm$  s.e.m. error bars) associated with locomotion (scaled from  $COT_{NET}$ ,  $J \cdot kg^{-1} \cdot m^{-1}$ ) and maintenance costs (scaled from RMR,  $ml O_2 \cdot kg^{-1} \cdot min^{-1}$ ) for northern breed ( $n = 9$ ), hound ( $n = 7$ ), and retriever ( $n = 7$ ) dogs. Overall relative metabolic costs associated with both maintenance and locomotion were lowest for northern breeds as mass-specific resting costs were similar (approx.  $6-8 ml O_2 \cdot kg^{-1} \cdot min^{-1}$ ) across breed groups.
